# Supplementary material for: Associations between adolescent experiences, parent experiences and HbA1c: results following two surveys based on the Norwegian Childhood Diabetes Registry (NCDR)
Source: PubMed Central journal article supplement — BMJ Open. 2019 Nov 2;9(11):e032201. doi: 10.1136/bmjopen-2019-032201 (PMC6830699; doi:10.1136/bmjopen-2019-032201), 2019-11-02

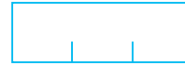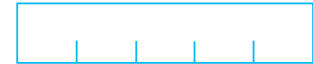

## Your experiences with the children's outpatient clinic

The questions below concern your experiences with the outpatient clinic you attend for diabetes. Please tick only one answer for each question.

### When you arrive at the outpatient clinic

#### 1. Are you well received at the outpatient clinic?

-  Not at all  
  To a small extent  
  To some extent  
  To a large extent  
  To a very large extent

#### 2. Do you feel there's a lot of waiting at the outpatient clinic?

-  Not at all  
  To a small extent  
  To some extent  
  To a large extent  
  To a very large extent

### The nurses

#### 3. Do you see the same nurses every time you attend the outpatient clinic?

-  Never  
  Rarely  
  Sometimes  
  Often  
  Always  
 Not applicable / Don't know

#### 4. Do the nurses speak to you in a way that you understand?

-  Not at all  
  To a small extent  
  To some extent  
  To a large extent  
  To a very large extent

#### 5. Do the nurses appear to know a lot about diabetes and diabetes treatment?

-  Not at all  
  To a small extent  
  To some extent  
  To a large extent  
  To a very large extent

#### 6. Do you feel safe bringing up things with the nurses that are difficult to discuss?

-  Not at all  
  To a small extent  
  To some extent  
  To a large extent  
  To a very large extent  
 Not applicable / Don't know

## The doctor

The questions below are about your doctor. If you see more than one doctor, please consider all the doctors you see when you are answering the questions.

### 7. Do you see the same doctor every time you attend the outpatient clinic?

-   Never
-   Rarely
-   Sometimes
-   Often
-   Always
- Not applicable / Don't know

### 8. Do the doctor speak to you in a way that you understand?

-   Not at all
-   To a small extent
-   To some extent
-   To a large extent
-   To a very large extent
- Not applicable / Don't know

### 9. Do the doctor appear to know a lot about diabetes and diabetes treatment?

-   Not at all
-   To a small extent
-   To some extent
-   To a large extent
-   To a very large extent
- Not applicable / Don't know

### 10. Do you feel safe bringing up things with the doctor that are difficult to discuss?

-   Not at all
-   To a small extent
-   To some extent
-   To a large extent
-   To a very large extent
- Not applicable / Don't know

## More about your diabetes check-ups

### 11. Are you given good advice to help you choose the right insulin dose?

-   Not at all
-   To a small extent
-   To some extent
-   To a large extent
-   To a very large extent

### 12. Do you have a say in what should be followed up before the next appointment?

-   Not at all
-   To a small extent
-   To some extent
-   To a large extent
-   To a very large extent
- Not applicable / Don't know

### 13. Do the staff who work at the outpatient clinic appear to understand what it's like to be young and have diabetes?

-   Not at all
-   To a small extent
-   To some extent
-   To a large extent
-   To a very large extent
- Not applicable / Don't know

### 14. Do you get enough time with the doctor or nurse during you appointment?

-   Not at all
-   To a small extent
-   To some extent
-   To a large extent
-   To a very large extent

**15. How do you feel about the number of appointments you have at the outpatient clinic each year?**

- Too few
- A sufficient amount
- Too many
- Not applicable / Don't know*

### Food and exercise

**16. Are you given good information and guidance about food?**

-   Not at all
-   To a small extent
-   To some extent
-   To a large extent
-   To a very large extent

**17. Are you given good information and guidance about exercise?**

-   Not at all
-   To a small extent
-   To some extent
-   To a large extent
-   To a very large extent
- Not applicable / Don't know*

### Devices/equipment

**18. Are you involved in deciding which devices/equipment you should use?**

-   Not at all
-   To a small extent
-   To some extent
-   To a large extent
-   To a very large extent
- Not applicable / Don't know*

**19. Do you receive good training in managing the devices/equipment?**

-   Not at all
-   To a small extent
-   To some extent
-   To a large extent
-   To a very large extent
- Not applicable / Don't know*

### Appointment with others

**20. Can you get an appointment with a nutritionist if you need one? (A nutritionist gives advice about food and diet)**

- Yes
- No
- Not applicable/Don't know*

**21. Can you get an appointment with a psychologist if you need one?**

- Yes
- No
- Not applicable/Don't know*

### Bringing parents/guardians with you

**22. How often do your parents/guardians attend the outpatient clinic with you?**

- Never
- Rarely
- Sometimes
- Often
- Always

**23. If your parents/guardians attend the appointment with you, who does the doctor or nurse mostly speak to?**

- Mostly to me
- Mostly to my parents/guardians
- About the same to each of us
- Parents/guardians do not come with me

**24. If needed, can you get an appointment with your doctor or nurse without your parents/guardians being present?**

- Yes
- No
- Not applicable/Don't know*

**Other questions**

**25. All in all, has attending the outpatient clinic helped you with your diabetes?**

-  Not at all
-  To a small extent
-  To some extent
-  To a large extent
-  To a very large extent

**26. Who completed this questionnaire?**

- Me on my own
- Me and my parents/guardians together
- My parents/guardians on their own

**27. All in all, how are you feeling today?**

-  Very bad
-  Fairly bad
-  Both and
-  Rather good
-  Very good

**28. Do you alternate between living with each of your parents/guardians?**

- Yes
- No
- Not applicable*

**Any additional comments about the outpatient clinic or how you found completing the questionnaire:**

---

---

---

---

---

---

---

---

---

---

---

---

---

---

---

---

---

---

---

---

---

---

---

---

---

---

---

---

---

---

---

Thank you for taking the time to answer.

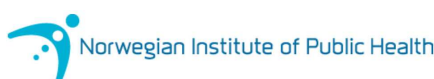

Supplement: bmjopen-2019-032201supp002.pdf [file bmjopen-2019-032201supp002.pdf]
